# Supplementary material for: Analysis of non-specific lipid transfer proteins in sorghum revealed specific clades involved in the formation of protective barriers in pollen, seed, and root tissues
Source: Research Square preprint supplement (doi:10.21203/rs.3.rs-8470545/v1), 2026-02-10
Supplement: Supplementary file 1 [file 0e1029e9405a615b76424ece.xlsx]

## Sheet: Table S1
Table S1: List of LTP genes in sorghum and their sequence features (bp : base pair, MW : Molecular weight, PI : Isoeletric Point, aa : Amino acid, d : Dalton)
Sl. No.	Gene Name	Gene ID (Phytozome)	Strand	Ch Number	Coordinates (5'-3') bp	No. of Introns	Immature Protein*			Mature Protein**		N-terminal		GPI (Y/N)	Subcellular localization	Type
							Length (aa)	MW (d)	PI	Length (aa)	MW (d)	Y/N	If yes, length (aa)
1	SbLTP1.1	Sobic.002G129100	1	2	18192662-18194743	1	189	18998.7	8.64	157	15955	Y	32	N	-	LTP1
2	SbLTP1.2	Sobic.003G016000	-1	3	1470423-1471624	1	135	13412.5	5.53	107	10782.4	Y	28	N	Extracellular	LTP1
3	SbLTP1.3	Sobic.003G338700	-1	3	72532554-72533520	1	123	12497.6	9.22	95	9900.41	Y	28	N	Extracellular	LTP1
4	SbLTP1.4	Sobic.005G012600	1	5	1167001-1167340	0	113	10897.5	8.92	90	8786.03	Y	23	N	Extracellular	LTP1
5	SbLTP1.5	Sobic.007G029800	-1	7	2733872-2735050	2	125	12755.8	8.47	93	9713.02	Y	32	N	Extracellular	LTP1
6	SbLTP1.6	Sobic.008G030600	-1	8	2803663-2805719	1	150	15103.4	9.86	150	15103.4	N	-	N	Extracellular	LTP1
7	SbLTP1.7	Sobic.008G030700	-1	8	2814445-2815657	1	123	12048.7	9.1	93	9071.16	Y	30	N	Extracellular	LTP1
8	SbLTP1.8	Sobic.008G030802	-1	8	2821167-2821526	0	119	11739.4	9.75	93	9212.38	Y	26	N	Extracellular	LTP1
9	SbLTP1.9	Sobic.008G030902	-1	8	2828663-2829165	1	119	11564.1	9.3	93	9142.2	Y	26	N	Extracellular	LTP1
10	SbLTP1.10	Sobic.008G031000	-1	8	2847899-2849215	1	126	12211	8.73	96	9350.59	Y	30	N	Extracellular	LTP1
11	SbLTP1.11	Sobic.010G159500	-1	10	48433155-48434073	1	115	11934.7	4.79	92	9707.01	Y	23	N	Extracellular	LTP1
12	SbLTP2.1	Sobic.001G200900	1	1	18378196-18378738	0	95	9628.13	7.51	68	7172.13	Y	27	N	Extracellular	LTP2
13	SbLTP2.2	Sobic.001G535600	1	1	84050056-84050666	0	126	13099	9.04	126	13099	N	-	N	Extracellular	LTP2
14	SbLTP2.3	Sobic.002G109100	1	2	13314508-13315524	0	124	12670.5	7.48	76	8028.23	Y	48	N	Extracellular	LTP2
15	SbLTP2.4	Sobic.002G109400	1	2	13344927-13345882	0	104	10712.6	8.72	77	8030.35	Y	27	N	Extracellular	LTP2
16	SbLTP2.5	Sobic.002G109500	1	2	13382026-13382755	0	103	10642.5	5.63	78	8170.47	Y	25	N	Extracellular	LTP2
17	SbLTP2.6	Sobic.003G263702	-1	3	66429430-66430424	0	105	11574.9	9.83	77	8660.16	Y	28	N	Extracellular	LTP2
18	SbLTP2.7	Sobic.003G263800	-1	3	66430885-66431178	0	97	10221.1	9.38	74	8014.33	Y	23	N	Extracellular	LTP2
19	SbLTP2.8	Sobic.003G399600	1	3	77245880-77246639	0	102	10868.6	8.71	71	7757.75	Y	31	N	Extracellular	LTP2
20	SbLTP2.9	Sobic.003G399700	1	3	77249137-77249981	0	105	10631.4	8.34	78	8180.4	Y	27	N	Extracellular	LTP2
21	SbLTP2.10	Sobic.005G110000	-1	5	51013504-51014357	0	91	9538.67	9.3	65	6999.45	Y	26	N	Extracellular	LTP2
22	SbLTP2.11	Sobic.005G110040	-1	5	51007575-51007850	0	91	9538.67	9.3	65	6999.45	Y	26	N	-	LTP2
23	SbLTP2.12	Sobic.005G110080	-1	5	50987758-50988371	0	91	9429.52	9.16	65	7017.49	Y	26	N	-	LTP2
24	SbLTP2.13	Sobic.005G110086	-1	5	50994372-50995043	0	91	9538.67	9.3	65	6999.45	Y	26	N	Extracellular	LTP2
25	SbLTP2.14	Sobic.005G110092	-1	5	51000623-51001486	0	91	9538.67	9.3	65	6999.45	Y	26	N	-	LTP2
26	SbLTP2.15	Sobic.007G001600	1	7	135818-136504	0	89	9085.7	8.88	65	6898.01	Y	24	N	Extracellular	LTP2
27	SbLTP2.16	Sobic.009G221900	1	9	60292144-60293293	0	97	9917.63	8.82	69	7143.24	Y	28	N	Extracellular	LTP2
28	SbLTP2.17	Sobic.009G222000	1	9	60295011-60295708	0	104	10492.4	9.6	71	7436.78	Y	33	N	Extracellular	LTP2
29	SbLTP2.18	Sobic.010G256100	1	10	61027976-61029005	0	96	9616.18	8.65	68	6961.05	Y	28	N	Extracellular	LTP2
30	SbLTPC.1	Sobic.001G266500	-1	1	54875302-54876548	1	125	13216.1	6.68	98	10592	Y	27	N	Extracellular	LTPC
31	SbLTPC.2	Sobic.002G270400	1	2	66704033-66704386	0	117	11596.7	8.92	75	7583.8	Y	42	N	-	LTPC
32	SbLTPC.3	Sobic.007G180700	-1	7	64763825-64765019	1	103	10043.6	5.46	67	6621.58	Y	36	N	Extracellular	LTPC
33	SbLTPD.1	Sobic.001G266600	-1	1	54879018-54880152	1	112	11715.3	4.55	84	8944.02	Y	28	N	Extracellular	LTPD
34	SbLTPD.2	Sobic.001G266900	-1	1	54941801-54942315	2	119	12258.2	5.76	91	9553.94	Y	28	N	Extracellular	LTPD
35	SbLTPD.3	Sobic.003G326200	1	3	71564438-71565254	1	123	12821.8	5.07	102	10745.1	Y	21	N	Plasma Membrane	LTPD
36	SbLTPD.4	Sobic.003G326300	1	3	71571962-71572619	1	111	12127.3	8.75	87	9714.39	Y	24	N	Extracellular	LTPD
37	SbLTPD.5	Sobic.003G356500	-1	3	73845215-73846886	1	118	12100.4	9.3	91	9348.1	Y	27	N	Extracellular	LTPD
38	SbLTPD.6	Sobic.005G096101	1	5	15306914-15308642	1	111	11285.1	8.49	91	9239.56	Y	20	N	Extracellular	LTPD
39	SbLTPD.7	Sobic.006G074200	1	6	45010677-45012046	1	117	11771.9	9.08	95	9609.1	Y	22	N	Extracellular	LTPD
40	SbLTPD.8	Sobic.006G074300	1	6	45014886-45015399	1	117	11770.8	8.4	92	9284.74	Y	25	N	Extracellular	LTPD
41	SbLTPD.9	Sobic.008G063800	1	8	7053069-7053510	1	107	11874.1	8.73	87	9882.53	Y	20	N	Extracellular	LTPD
42	SbLTPD.10	Sobic.008G064000	1	8	7136727-7137411	1	107	11888.2	8.87	87	9866.58	Y	20	N	Extracellular	LTPD
43	SbLTPD.11	Sobic.009G239400	1	9	61520478-61521016	1	119	12970.4	9.15	92	9896.61	Y	27	N	Extracellular	LTPD
44	SbLTPG.1	Sobic.001G050300	-1	1	3714815-3717572	2	195	19852	8.37	166	17199.8	Y	29	Y	Plasma Membrane	LTPG
45	SbLTPG.2	Sobic.001G059500	-1	1	4501791-4502839	2	186	18391	5.79	155	15151.1	Y	31	Y	Plasma Membrane	LTPG
46	SbLTPG.3	Sobic.001G059600	1	1	4505278-4506351	2	198	20143.3	7.52	167	16886.3	Y	31	Y	Plasma Membrane	LTPG
47	SbLTPG.4	Sobic.001G059700	1	1	4508336-4509553	2	183	17324.6	8.88	151	14515.3	Y	32	Y	Plasma Membrane	LTPG
48	SbLTPG.5	Sobic.001G128500	-1	1	10227007-10228425	1	160	15085.9	8.15	133	12506.9	Y	27	Y	Plasma Membrane	LTPG
49	SbLTPG.6	Sobic.001G144700	-1	1	11725609-11726657	1	218	21151.1	5.13	191	18379.8	Y	27	Y	Plasma Membrane	LTPG
50	SbLTPG.7	Sobic.001G144800	-1	1	11730022-11731008	0	216	21295.3	5.76	181	17669	Y	35	Y	Plasma Membrane	LTPG
51	SbLTPG.8	Sobic.001G353501	-1	1	68488135-68490993	2	175	16608.1	8.4	152	14521.6	Y	23	Y	Plasma Membrane	LTPG
52	SbLTPG.9	Sobic.001G387700	-1	1	71629990-71632602	1	196	19187.1	8.66	169	16585	Y	27	Y	Plasma Membrane	LTPG
53	SbLTPG.10	Sobic.001G473200	1	1	78694675-78696022	2	212	20697.7	8.95	180	17459.8	Y	32	Y	Plasma Membrane	LTPG
54	SbLTPG.11	Sobic.001G493100	-1	1	80377573-80379133	2	195	19452.3	7.52	169	16925.2	Y	26	Y	Plasma Membrane	LTPG
55	SbLTPG.12	Sobic.002G049400	1	2	4700439-4701982	2	214	20107.5	8.15	180	16956.8	Y	34	Y	Plasma Membrane	LTPG
56	SbLTPG.13	Sobic.002G049500	1	2	4709105-4710486	2	179	18113.8	5.02	147	14972.1	Y	32	Y	Plasma Membrane	LTPG
57	SbLTPG.14	Sobic.002G050100	1	2	4767701-4769120	2	214	20878.1	8.17	180	17560.1	Y	34	Y	Plasma Membrane	LTPG
58	SbLTPG.15	Sobic.002G050300	1	2	4776074-4777425	2	211	20591.4	8.52	183	17799.1	Y	28	Y	Plasma Membrane	LTPG
59	SbLTPG.16	Sobic.002G050400	1	2	4779428-4780541	1	180	17225.5	8.48	152	14685.5	Y	28	Y	Plasma Membrane	LTPG
60	SbLTPG.17	Sobic.002G070200	1	2	7101072-7104655	0	210	20941.8	8.68	181	18159.5	Y	29	Y	Plasma Membrane	LTPG
61	SbLTPG.18	Sobic.002G382100	-1	2	75178423-75180983	2	167	15885.3	8.97	146	13945	Y	21	Y	Plasma Membrane	LTPG
62	SbLTPG.19	Sobic.003G333000	1	3	72072108-72074842	2	190	18550.4	6.04	164	16042.3	Y	26	Y	Plasma Membrane	LTPG
63	SbLTPG.20	Sobic.004G192600	1	4	56933069-56933699	2	176	19111.1	8.19	151	16469.9	Y	25	Y	Plasma Membrane	LTPG
64	SbLTPG.21	Sobic.006G089700	-1	6	47347693-47349960	1	218	21888.3	7.06	190	18977.9	Y	28	Y	Plasma Membrane	LTPG
65	SbLTPG.22	Sobic.006G108100	1	6	49148838-49149820	2	198	20094.3	8.45	174	17752.4	Y	24	Y	Plasma Membrane	LTPG
66	SbLTPG.23	Sobic.006G129100	1	6	50791974-50794636	2	214	21378.8	5.53	188	18665.4	Y	26	Y	Plasma Membrane	LTPG
67	SbLTPG.24	Sobic.007G192200	1	7	65874131-65877809	2	180	18904.4	7.48	156	16142.1	Y	24	Y	Plasma Membrane	LTPG
68	SbLTPG.25	Sobic.009G178500	-1	9	57090554-57092211	2	210	20768.8	6.52	179	17679	Y	31	Y	Plasma Membrane	LTPG
69	SbLTPG.26	Sobic.010G236500	1	10	59514617-59517409	2	152	15408.8	8.09	125	12766.4	Y	27	Y	Plasma Membrane	LTPG
70	SbLTPG.27	Sobic.010G261200	1	10	61342619-61344360	2	179	17021.3	8.67	150	14250	Y	29	Y	Plasma Membrane	LTPG
71	SbLTPx.1	Sobic.001G541400	-1	1	84631974-84633165	0	175	15975.1	8.82	151	13503	Y	24	N	Extracellular	LTPx
72	SbLTPx.2	Sobic.008G158400	1	8	62230088-62231361	0	273	22529	7.45	249	20043	Y	24	N	Extracellular	LTPx
73	SbLTPx.3	Sobic.008G158501	1	8	62234419-62235399	0	234	20164.8	5.13	210	17634.7	Y	24	N	Extracellular	LTPx
74	SbLTPx.4	Sobic.008G158600	1	8	62238638-62240841	2	190	17099	7.45	166	14584.9	Y	24	N	Extracellular	LTPx
75	SbLTPx.5	Sobic.008G158666	1	8	62257527-62258500	0	229	19735.5	7.45	205	17221.3	Y	24	N	Extracellular	LTPx
76	SbLTPx.6	Sobic.008G158732	1	8	62261392-62263669	1	232	20161	8.42	208	17646.9	Y	24	N	Extracellular	LTPx
77	SbLTPx.7	Sobic.008G158800	1	8	62266895-62268109	0	232	19988.8	8.09	208	17474.6	Y	24	N	Extracellular	LTPx
*Immature Protein : Protein with N-terminal
**Mature Protein : Protein without N-terminal

## Sheet: Table S2
Table S2: List of motif with their sequences by MEME software.
LTP motif	Sequencces	Domain
LTP_motif 1	APSAACCSGLRALVA	LTP domain
LTP_motif 2	CLCTYLKDPILGIYINLPRKL	LTP domain
LTP_motif 3	GGSGSGGSGSGGGGSGSGGGGALERCPMDTLKLGVCANVLNGLINVTLGT	Glycine rich region
LTP_motif 4	MVKKVAVLATLLALNLLLFGFADACGYDGGGSGGTGGSGGGGGGGGGSG	Glycine rich region
LTP_motif 5	ATRALALPAKCGVAIPPGS	LTP domain

## Sheet: Table S3
Table S3: Summary of LTP genes with duplication status, duplication type, and inferred evolutionary pattern
Sl. No.	GeneID_1	GeneID_2	Gene Name 1	Gene Name 2	Type	Type of Duplication	Ka	Ks	Ka_Ks	Type of evolution	Percentage Identity
1	Sobic.003G338700	Sobic.008G030700	SbLTP1.3	SbLTP1.7	Type 1	WGD or Segmental	0.589625	0.495289	1.19047	Positive selection	38.84
2	Sobic.005G012600	Sobic.008G030600	SbLTP1.4	SbLTP1.6	Type 1	WGD or Segmental	0.365126	0.538199	0.678422	Purifying selection	50.44
3	Sobic.008G030600	Sobic.008G030700	SbLTP1.6	SbLTP1.7	Type 1	Tandem	0.454836	0.630292	0.721628	Purifying selection	47.15
4	Sobic.008G030700	Sobic.008G030802	SbLTP1.7	SbLTP1.8	Type 1	Tandem	0.119677	0.177643	0.673692	Purifying selection	72.27
5	Sobic.008G030802	Sobic.008G030902	SbLTP1.8	SbLTP1.9	Type 1	Tandem	0.0386789	0.106125	0.364466	Purifying selection	88.79
6	Sobic.008G030902	Sobic.008G031000	SbLTP1.9	SbLTP1.10	Type 1	Tandem	0.470793	0.555054	0.848193	Purifying selection	52.1
7	Sobic.002G109400	Sobic.002G109500	SbLTP2.4	SbLTP2.5	Type 2	Tandem	0.306817	0.536565	0.571818	Purifying selection	57.84
8	Sobic.003G263702	Sobic.009G221900	SbLTP2.6	SbLTP2.16	Type 2	WGD or Segmental	0.617044	0.695775	0.886845	Purifying selection	35.05
9	Sobic.005G110040	Sobic.005G110000	SbLTP2.11	SbLTP2.10	Type 2	Tandem	0	0.0147425	0	Purifying selection	100
10	Sobic.005G110080	Sobic.005G110086	SbLTP2.12	SbLTP2.13	Type 2	Tandem	0.0198195	0.0451264	0.439199	Purifying selection	95.6
11	Sobic.005G110086	Sobic.005G110092	SbLTP2.13	SbLTP2.14	Type 2	Tandem	0	0	NaN	Purifying selection	100
12	Sobic.005G110092	Sobic.005G110040	SbLTP2.14	SbLTP2.11	Type 2	Tandem	0	0	NaN	Purifying selection	100
13	Sobic.009G221900	Sobic.009G222000	SbLTP2.16	SbLTP2.17	Type 2	Tandem	0.364585	0.364098	1.00134	Positive selection	55.67
14	Sobic.001G266500	Sobic.001G266600	SbLTPC.1	SbLTPD.1	TypeC/D	Tandem	0.456977	0.662528	0.689748	Purifying selection	47.27
15	Sobic.002G270400	Sobic.007G180700	SbLTPC.2	SbLTPC.3	Type C	WGD or Segmental	0.496898	0.663604	0.748788	Purifying selection	51.55
16	Sobic.001G266600	Sobic.001G266900	SbLTPD.1	SbLTPD.2	Type D	Tandem	0.284304	0.679844	0.41819	Purifying selection	58.88
17	Sobic.003G326200	Sobic.003G326300	SbLTPD.3	SbLTPD.4	Type D	Tandem	0.455856	1.45275	0.313787	Purifying selection	48.65
18	Sobic.006G074200	Sobic.006G074300	SbLTPD.7	SbLTPD.8	Type D	Tandem	0.0664195	0.178204	0.372717	Purifying selection	87.18
19	Sobic.008G063800	Sobic.008G064000	SbLTPD.9	SbLTPD.10	Type D	Tandem	0.0122037	0.0716535	0.170315	Purifying selection	97.2
20	Sobic.001G050300	Sobic.002G070200	SbLTPG.1	SbLTPG.17	Type G	WGD or Segmental	0.397541	0.547146	0.726571	Purifying selection	47.87
21	Sobic.001G059500	Sobic.002G049400	SbLTPG.2	SbLTPG.12	Type G	WGD or Segmental	0.434432	0.644264	0.674308	Purifying selection	44.05
22	Sobic.001G059600	Sobic.002G050100	SbLTPG.3	SbLTPG.14	Type G	WGD or Segmental	0.372457	0.737212	0.505224	Purifying selection	45.55
23	Sobic.001G144700	Sobic.001G144800	SbLTPG.6	SbLTPG.7	Type G	Tandem	0.53125	0.899271	0.590757	Purifying selection	38.76
24	Sobic.001G353501	Sobic.002G382100	SbLTPG.8	SbLTPG.18	Type G	WGD or Segmental	0.479244	0.835735	0.57344	Purifying selection	44.79
25	Sobic.001G387700	Sobic.003G333000	SbLTPG.9	SbLTPG.19	Type G	WGD or Segmental	0.554748	0.700404	0.79204	Purifying selection	35.37
26	Sobic.002G049400	Sobic.002G049500	SbLTPG.12	SbLTPG.13	Type G	Tandem	0.653889	1.4312	0.456883	Purifying selection	37.42
27	Sobic.003G333000	Sobic.009G178500	SbLTPG.19	SbLTPG.25	Type G	WGD or Segmental	0.365546	0.459889	0.794858	Purifying selection	48.15
28	Sobic.008G158400	Sobic.008G158501	SbLTPx.2	SbLTPx.3	Type x	Tandem	0.0341196	0.208432	0.163697	Purifying selection	91.88
29	Sobic.008G158501	Sobic.008G158600	SbLTPx.3	SbLTPx.4	Type x	Tandem	0.0497489	0.458523	0.108498	Purifying selection	84.3
30	Sobic.008G158600	Sobic.008G158666	SbLTPx.4	SbLTPx.5	Type x	Tandem	0	0.0197597	0	Purifying selection	98.4
31	Sobic.008G158666	Sobic.008G158732	SbLTPx.5	SbLTPx.6	Type x	Tandem	0.0182226	0.0440291	0.413876	Purifying selection	96.07
32	Sobic.008G158732	Sobic.008G158800	SbLTPx.6	SbLTPx.7	Type x	Tandem	0.0159953	0.0487977	0.327788	Purifying selection	96.55

## Sheet: Table S4
Table S4: Detailed counts of CAREs in each promoter of SbLTPs
Gene Name	Tissue-specific expression (FF00FF)							Stress Response(00FFFF)																															Hormonal Response (FFA500)
	CAT-box	GC-motif	GCN4_motif	HD-Zip 1	Motif I	NON-box	RY-element	AAAC-motif	ACE	AE-box	AT1-motif	Box II	C-box	CAG-motif	chs-CMA1a	chs-CMA2a	chs-CMA2b	chs-CMA2c	chs-Unit 1 m1	DRE	G-Box	GA-motif	Gap-box	GATA-motif	GATT-motif	GT1-motif	GTGGC-motif	I-box	L-box	LAMP-element	LS7	LTR	MBS	MRE	Sp1	TC-rich repeats	TCCC-motif	TCT-motif	ABRE	AuxRE	AuxRR-core	CGTCA-motif	GARE-motif	P-box	TATC-box	TCA-element	TGA-box	TGA-element	TGACG-motif
SbLTP1.1	2	0	0	0	0	0	0	0	0	0	0	0	1	0	0	0	0	0	0	0	3	0	0	0	0	0	0	1	0	0	1	1	3	0	1	1	0	1	4	0	0	4	0	2	0	1	0	2	4
SbLTP1.2	1	1	0	0	0	0	2	0	3	0	0	0	0	0	0	0	0	0	0	0	13	0	0	0	0	0	0	0	0	0	0	0	0	0	2	0	0	0	17	0	0	3	0	0	0	1	0	1	3
SbLTP1.3	0	1	0	0	0	0	0	0	1	0	1	0	0	0	0	0	0	0	0	0	4	1	0	0	0	0	0	0	0	0	0	0	2	0	1	1	1	0	4	0	0	4	1	2	0	0	0	0	4
SbLTP1.4	0	0	0	0	0	0	0	0	0	2	1	0	0	0	0	0	0	0	0	0	5	0	0	0	0	1	0	0	0	0	0	0	1	0	1	0	0	0	5	0	0	3	1	0	0	0	0	0	3
SbLTP1.5	0	0	0	0	1	0	1	0	1	0	0	0	0	0	0	0	0	0	0	0	7	0	0	2	0	1	0	0	0	0	0	0	0	0	5	0	1	0	8	0	0	8	0	0	0	0	0	1	8
SbLTP1.6	3	0	0	0	0	1	0	0	0	0	0	0	0	0	0	0	0	0	0	0	6	0	0	0	0	1	0	0	0	0	0	1	3	0	0	0	0	0	5	0	0	7	0	0	0	1	0	1	7
SbLTP1.7	1	0	0	0	0	0	3	0	0	2	1	0	0	0	0	0	0	0	0	0	4	0	0	0	0	0	0	0	0	0	0	2	3	1	0	0	0	0	2	0	0	6	0	2	0	0	0	0	6
SbLTP1.8	0	0	1	0	0	0	1	0	1	0	0	0	0	0	1	0	0	0	0	0	4	0	0	1	0	1	0	0	0	0	0	2	2	2	3	0	0	0	2	0	0	5	0	1	0	0	0	1	5
SbLTP1.9	0	0	0	0	0	0	1	0	0	0	1	0	0	0	0	0	0	0	0	0	5	0	0	1	0	0	0	0	0	0	0	2	3	1	2	0	0	0	4	0	0	3	0	0	0	0	0	0	3
SbLTP1.10	4	0	0	0	0	0	0	0	0	0	1	0	0	0	0	0	0	0	0	0	7	0	0	0	0	0	0	0	0	0	0	0	1	0	1	0	0	0	6	0	0	4	0	1	0	1	0	0	4
SbLTP1.11	1	1	0	0	0	0	0	0	1	1	0	0	0	0	0	0	0	0	0	0	4	0	0	2	0	0	0	0	0	0	0	2	1	0	0	0	0	1	4	0	0	4	0	0	0	0	0	1	4
SbLTP2.1	8	0	1	0	0	0	0	0	0	0	0	0	1	0	0	1	0	0	0	0	1	0	0	0	0	0	0	2	0	1	0	0	2	0	1	1	0	1	3	0	0	2	1	1	0	0	0	1	2
SbLTP2.2	1	1	1	0	0	0	0	0	1	0	1	0	0	0	0	0	0	0	0	0	3	0	0	0	0	1	0	0	0	0	0	0	1	0	2	0	0	0	2	0	0	9	0	1	0	0	0	0	9
SbLTP2.3	1	1	0	0	0	0	2	0	0	1	2	0	0	0	0	0	0	0	0	0	5	0	0	1	0	4	0	0	0	0	0	3	2	1	1	0	0	2	1	0	0	3	0	0	0	0	0	1	3
SbLTP2.4	1	1	0	0	0	0	0	0	0	0	1	0	0	0	0	0	0	0	0	0	4	0	0	1	0	3	0	0	0	0	0	4	1	0	1	0	0	0	2	0	0	2	0	0	2	0	0	2	2
SbLTP2.5	1	0	0	0	0	0	0	0	0	0	0	0	0	0	0	0	0	0	0	0	2	0	0	0	0	0	0	1	0	0	0	0	2	0	2	0	0	0	2	0	0	3	0	0	0	0	0	1	3
SbLTP2.6	0	1	1	1	0	0	0	0	1	0	0	0	1	0	0	0	0	0	0	0	10	0	0	1	0	1	0	0	0	0	0	1	1	0	2	0	1	0	6	0	0	2	0	0	0	0	0	2	2
SbLTP2.7	0	0	1	1	0	0	0	0	1	0	0	0	1	0	0	0	0	0	0	0	7	0	0	2	0	1	0	0	0	0	0	2	2	0	2	1	1	1	5	0	1	1	1	0	0	0	0	0	1
SbLTP2.8	3	2	0	0	0	0	1	0	0	0	0	0	0	1	0	0	0	0	0	0	7	0	0	0	0	0	0	0	0	0	0	0	2	2	1	1	2	0	7	0	0	4	0	0	0	0	0	1	4
SbLTP2.9	1	1	1	0	0	0	0	0	1	1	0	0	0	0	0	0	0	0	0	0	4	0	0	0	0	0	0	1	0	0	0	0	0	0	1	0	0	0	3	0	1	5	0	0	0	0	0	1	5
SbLTP2.10	2	0	2	0	0	0	0	0	0	0	0	0	0	0	0	0	0	0	0	0	4	0	1	1	0	2	0	0	0	0	0	0	1	0	0	0	0	0	4	0	0	2	1	0	0	0	0	0	2
SbLTP2.11	3	0	1	0	0	0	0	0	0	0	0	0	0	0	0	1	0	0	0	0	4	1	1	1	0	2	0	0	0	0	0	0	1	0	0	0	0	0	4	0	0	2	1	1	1	0	0	0	2
SbLTP2.12	3	0	2	0	0	0	0	0	0	0	0	0	0	0	0	0	0	0	0	0	1	0	1	1	0	3	0	0	0	0	0	0	2	0	0	0	0	0	1	0	0	2	0	1	0	0	0	0	2
SbLTP2.13	3	0	1	0	0	0	0	0	0	0	0	0	0	0	0	1	0	0	0	0	6	1	0	1	0	2	0	0	0	0	0	0	1	0	0	0	0	0	6	0	0	2	1	1	1	0	0	0	2
SbLTP2.14	3	0	1	0	0	0	0	0	0	0	0	0	0	0	0	1	0	0	0	0	4	1	1	1	0	2	0	0	0	0	0	0	1	0	0	0	0	0	4	0	0	2	1	1	1	0	0	0	2
SbLTP2.15	2	0	0	0	0	0	0	0	2	0	0	0	0	0	0	0	0	0	0	0	0	1	0	0	1	0	0	0	0	0	0	0	2	0	0	1	1	0	0	0	0	1	0	0	1	0	0	0	1
SbLTP2.16	4	1	0	0	0	0	0	0	0	1	0	0	0	0	0	0	0	0	0	0	2	0	0	1	0	4	0	3	0	0	0	2	2	0	1	0	1	1	5	0	1	3	0	0	0	0	0	1	3
SbLTP2.17	1	0	0	0	0	0	2	0	0	0	0	0	0	0	0	0	0	0	0	0	5	0	1	0	0	1	0	0	0	0	0	1	0	0	1	1	1	0	4	0	1	6	0	0	0	2	0	0	6
SbLTP2.18	1	1	0	0	0	0	2	0	0	0	1	0	0	0	0	0	0	0	0	0	8	0	0	0	0	2	0	2	0	0	0	0	1	0	3	0	0	1	5	0	0	5	0	0	0	0	0	0	5
SbLTPC.1	0	1	0	0	0	0	0	0	0	0	0	1	0	1	0	0	0	0	0	0	0	2	0	1	1	0	0	1	0	0	0	0	1	0	0	0	0	1	1	0	0	2	2	0	0	0	0	1	2
SbLTPC.2	4	0	0	0	0	0	0	0	0	0	0	0	0	0	1	1	0	0	0	0	6	1	0	0	0	0	0	0	0	0	0	2	0	0	1	0	1	1	5	0	0	4	0	1	1	0	0	0	4
SbLTPC.3	0	1	0	0	0	0	0	0	0	0	0	0	0	0	0	0	0	0	0	0	4	0	0	0	0	0	1	0	0	0	0	1	5	0	1	0	1	0	4	0	0	3	0	1	0	0	0	0	3
SbLTPD.1	2	0	0	0	0	0	0	0	0	0	0	1	0	0	0	0	0	0	0	0	3	1	0	1	0	0	0	1	0	0	0	1	4	0	1	0	0	2	2	0	0	2	0	0	1	1	0	1	2
SbLTPD.2	0	0	1	0	0	0	0	0	0	0	0	1	0	0	1	0	0	0	0	0	3	0	0	0	0	1	0	0	0	0	0	0	0	0	0	0	0	1	2	0	0	2	0	0	0	0	0	1	2
SbLTPD.3	2	0	1	1	0	0	0	0	0	1	0	0	0	0	0	0	0	0	0	0	1	0	0	0	0	1	0	0	0	0	0	1	2	1	0	1	0	3	1	0	0	4	1	1	0	1	0	0	4
SbLTPD.4	1	0	1	0	0	0	0	0	0	0	0	0	0	0	0	0	0	0	0	0	5	0	0	0	0	3	0	0	0	0	0	1	0	0	0	0	0	2	3	0	0	0	0	0	0	0	0	0	0
SbLTPD.5	0	1	0	0	0	0	0	0	0	0	0	0	0	0	0	0	0	0	0	1	2	0	0	0	0	0	1	0	0	0	0	1	0	0	1	0	0	1	1	0	0	4	0	0	0	0	0	1	4
SbLTPD.6	1	0	0	1	0	0	0	0	0	1	0	0	0	0	0	1	1	0	0	0	0	0	0	0	0	0	0	0	0	0	0	0	1	0	0	1	0	0	1	0	0	5	1	0	0	0	0	0	5
SbLTPD.7	1	0	0	0	0	0	1	0	1	0	0	0	0	0	0	0	0	0	0	0	5	0	0	0	0	0	0	0	0	0	0	0	1	1	1	2	0	1	8	0	0	1	0	1	1	0	0	2	1
SbLTPD.8	2	1	0	0	0	0	0	0	1	0	0	0	0	0	0	0	0	0	0	0	3	0	0	0	0	0	0	1	1	0	0	0	2	0	1	0	0	0	4	0	0	5	0	0	1	1	0	0	5
SbLTPD.9	1	0	0	0	0	0	0	0	0	0	0	0	0	0	0	0	0	0	0	0	3	0	0	1	1	1	0	0	0	1	0	0	0	0	1	0	2	0	1	0	0	1	1	1	0	1	0	0	1
SbLTPD.10	1	0	0	0	0	0	0	0	0	0	0	0	0	0	0	0	0	0	0	0	5	2	0	4	1	8	0	0	0	0	0	0	2	0	0	0	0	0	3	0	1	1	0	1	0	1	0	0	1
SbLTPD.11	0	0	0	1	0	0	0	0	0	0	0	0	0	0	1	0	0	0	0	0	8	0	0	1	0	3	0	2	0	0	0	0	1	0	2	0	0	0	6	0	1	2	2	0	0	0	0	0	2
SbLTPG.1	0	2	0	0	0	0	4	0	1	0	1	0	0	0	0	0	0	0	0	0	9	1	0	0	0	0	0	1	0	0	0	0	0	0	2	0	0	0	9	0	2	6	0	0	0	1	0	0	6
SbLTPG.2	2	0	0	0	0	0	0	0	0	0	0	0	0	1	0	0	0	0	0	0	7	1	0	0	0	0	1	0	0	0	0	0	1	0	0	0	0	0	7	0	0	8	1	0	0	3	0	1	8
SbLTPG.3	3	0	0	0	0	0	0	0	0	0	0	0	0	1	0	0	0	0	0	0	6	1	0	0	0	0	0	0	0	0	0	0	1	0	1	0	1	0	7	0	0	7	0	0	0	2	0	1	7
SbLTPG.4	0	2	0	0	0	0	0	0	2	1	1	0	0	0	0	0	0	0	0	0	10	0	0	0	0	2	0	0	0	0	0	0	1	1	0	1	0	2	7	0	0	5	0	0	1	2	0	0	5
SbLTPG.5	0	0	0	0	0	0	0	0	1	1	0	2	0	0	0	0	0	0	0	0	6	0	0	0	0	0	0	0	0	0	0	1	0	0	2	0	0	0	6	0	1	3	1	0	0	2	0	2	3
SbLTPG.6	3	0	0	0	0	0	1	0	0	0	0	0	1	0	0	0	0	0	0	0	6	0	0	0	0	1	0	0	0	0	0	1	2	0	0	0	1	0	6	0	0	5	1	1	0	1	0	1	5
SbLTPG.7	2	1	0	0	0	0	0	0	0	0	0	0	0	0	0	0	0	1	0	0	7	0	0	1	0	0	0	2	0	0	0	0	1	1	4	0	1	0	6	0	2	5	0	0	0	1	0	3	5
SbLTPG.8	2	2	0	0	0	0	0	0	0	0	0	0	0	0	0	0	0	0	0	0	8	1	0	0	0	0	0	0	0	0	0	0	0	0	3	0	0	2	7	0	0	2	1	0	0	1	0	0	2
SbLTPG.9	1	2	0	0	0	0	0	0	1	0	0	0	0	0	0	0	0	0	0	0	5	2	0	1	0	1	0	0	0	0	0	0	1	0	5	1	1	0	4	0	0	5	0	0	0	2	0	0	5
SbLTPG.10	4	0	0	0	0	0	1	0	0	2	0	0	0	0	0	0	0	0	0	0	10	1	0	1	0	0	0	0	0	0	0	0	2	0	2	0	0	0	9	0	1	5	0	1	0	2	0	0	5
SbLTPG.11	3	1	0	0	0	0	0	0	0	0	0	0	1	0	0	0	0	0	0	0	9	0	0	3	1	0	0	0	0	0	0	0	0	0	2	0	1	1	9	0	2	7	1	0	0	1	0	0	7
SbLTPG.12	3	0	0	0	0	0	0	0	0	1	0	0	0	0	0	0	0	0	0	0	6	0	0	1	0	1	0	1	0	0	0	1	2	0	1	0	0	0	5	0	0	4	0	0	0	1	0	1	4
SbLTPG.13	2	1	1	0	0	0	0	0	0	0	0	0	0	0	0	0	0	0	0	0	2	1	1	1	0	1	0	0	0	0	0	1	0	0	0	0	1	1	2	0	0	6	0	1	0	0	0	0	6
SbLTPG.14	0	0	0	0	0	0	0	0	1	0	0	0	0	0	1	0	0	0	0	0	6	0	0	0	0	0	0	1	0	0	0	0	2	1	0	0	0	0	3	0	0	9	1	0	0	1	0	2	9
SbLTPG.15	0	2	0	0	0	0	1	0	0	0	1	0	0	0	0	0	0	0	0	0	8	0	0	0	0	1	0	1	0	0	0	0	1	0	4	0	0	0	6	0	0	6	0	0	0	0	0	2	6
SbLTPG.16	0	1	0	0	0	0	0	0	0	1	0	0	0	0	0	0	0	0	0	0	3	0	0	0	0	5	0	0	0	1	0	1	3	0	1	0	1	0	2	0	1	5	1	1	0	1	0	1	5
SbLTPG.17	2	2	0	0	0	0	3	1	1	0	0	0	0	0	0	0	0	0	0	1	8	0	0	3	0	0	0	3	0	0	0	1	2	0	4	2	0	0	8	0	0	8	2	0	0	1	0	0	8
SbLTPG.18	0	0	0	0	0	0	1	0	1	0	0	0	0	1	0	0	0	0	1	0	7	0	0	0	0	1	0	0	0	0	0	1	4	0	2	0	0	0	9	0	0	2	0	1	0	1	0	1	2
SbLTPG.19	1	0	0	0	0	0	0	0	0	1	0	0	1	0	0	0	0	0	0	0	7	0	0	2	0	0	0	1	0	0	0	2	4	0	2	0	0	0	11	0	0	7	0	0	0	0	0	1	7
SbLTPG.20	1	0	0	0	0	0	2	0	0	3	0	0	0	0	0	0	0	0	0	0	3	0	0	0	0	1	0	0	0	0	0	1	0	2	1	1	0	0	2	0	2	4	0	0	0	1	0	1	4
SbLTPG.21	1	2	0	0	0	0	0	0	1	0	0	0	0	0	0	0	0	0	0	0	2	0	0	1	0	0	0	0	0	0	0	0	0	0	5	0	0	3	2	0	0	3	0	0	0	0	0	0	3
SbLTPG.22	0	1	0	0	0	0	1	0	1	0	0	0	0	0	0	0	0	0	1	0	5	0	0	2	0	1	0	0	0	0	0	0	3	0	2	0	0	3	3	0	1	4	0	0	0	0	0	0	4
SbLTPG.23	0	1	0	0	1	0	0	0	0	0	0	0	0	0	0	0	0	0	0	0	7	1	0	2	0	0	1	0	0	0	0	1	1	0	3	1	0	1	7	0	0	1	1	0	0	0	0	0	1
SbLTPG.24	0	2	0	0	1	0	1	0	0	0	0	0	1	0	0	0	0	0	1	0	9	0	0	1	0	0	0	1	0	0	0	0	1	0	7	2	1	1	9	0	0	10	0	0	0	1	0	1	10
SbLTPG.25	1	2	1	0	0	0	0	0	0	0	2	0	0	0	0	0	0	0	0	0	8	0	0	0	0	4	0	0	0	0	0	0	1	1	6	0	2	0	10	1	0	9	0	0	0	0	1	1	9
SbLTPG.26	4	0	0	0	0	0	0	0	0	0	0	0	0	0	0	0	0	0	0	0	2	1	0	0	0	0	0	1	0	0	0	0	1	0	1	0	1	1	2	0	0	1	1	1	0	0	0	1	1
SbLTPG.27	0	0	0	0	0	0	0	0	0	0	0	0	0	0	0	0	0	0	0	0	13	0	0	0	0	0	0	1	0	0	0	0	1	0	4	0	1	0	14	0	1	3	0	0	1	0	0	1	3
SbLTPx.1	1	2	0	0	0	0	8	0	0	0	0	0	0	0	0	0	0	0	0	0	9	0	0	0	0	0	0	0	0	0	0	1	0	0	1	0	0	0	11	0	0	2	0	0	0	0	0	2	2
SbLTPx.2	4	0	0	0	0	0	1	0	1	0	0	0	0	0	0	0	0	0	0	0	3	0	1	1	0	0	0	2	0	0	0	0	0	0	3	0	1	1	4	0	0	1	0	1	1	0	0	0	1
SbLTPx.3	4	0	0	0	0	0	0	0	1	0	0	0	0	0	0	0	0	0	0	0	5	1	0	1	0	3	0	1	0	0	0	0	1	0	2	0	1	0	4	0	0	4	0	1	0	1	0	0	4
SbLTPx.4	3	0	0	0	0	0	0	0	2	0	0	0	0	0	0	0	0	0	0	0	8	0	1	2	0	2	0	0	0	0	0	1	0	0	3	0	2	0	6	0	0	3	1	1	1	0	0	0	3
SbLTPx.5	4	0	1	0	0	0	0	0	1	0	0	0	0	0	0	0	0	0	0	0	8	0	1	0	0	3	0	0	0	0	0	1	0	0	3	0	0	1	7	0	1	7	1	1	0	0	0	0	7
SbLTPx.6	4	0	0	0	0	0	0	0	0	0	0	0	0	0	0	0	0	0	0	0	9	0	0	0	0	3	0	1	1	0	0	0	1	0	3	0	0	0	7	0	0	6	1	1	0	0	0	0	6
SbLTPx.7	4	0	0	0	0	0	0	0	1	0	0	0	0	0	0	0	0	0	0	0	9	0	0	1	0	3	0	0	0	0	0	0	1	0	3	0	1	0	7	0	0	4	0	1	0	0	0	1	4
	Meristem expression	Anoxic specific inducibility	Endosperm expression	Palisade mesophyll cells	Root specific	Meristem specific activation	Seed-specific regulation	Light responsive element	Light responsiveness	Light response	Light responsive module	Light responsive element	Light responsiveness	Light response element	Light response element	Light response element	Light response element	Light response element	Light response element	Dehydration, Low-temp, Salt stresses	Light responsiveness	Light responsive element	Light responsive element	Light responsive element	Light responsive element	Light responsive element	Light responsive element	Light responsive element	Light responsive element	Light responsive element	Light responsive element	Low-temperature responsiveness	MYB binding site involved in drought-inducibility	MYB binding site involved in light responsiveness	Light responsive element	Defense and stress responsiveness	Light responsive element	Light responsive element	Abscisic acid responsiveness	Auxin-responsive element	Auxin responsiveness	MeJA-responsiveness	Gibberellin-responsive element	Gibberellin-responsive element	Gibberellin-responsiveness	Salicylic acid responsiveness	Auxin-responsive element	Auxin-responsive element	MeJA-responsiveness
